# Supplementary material for: Effects of vacancy defects on the magnetic properties of vanadium diselenide monolayers: a first principle investigation
Source: Royal Society of Chemistry journal article supplement (doi:10.1039/d2cp01537d), 2022-01-01
Supplement: d2cp01537d1.pdf [file d2cp01537d1.pdf]

## Supporting Information

### Effects of Vacancy Defects on the Magnetic Properties of Vanadium Diselenide

#### Monolayers: a First Principle Investigation

Yan Zhu, Yinlu Gao, Xue Jiang\*, Jijun Zhao

*Key Laboratory of Material Modification by Laser, Ion and Electron Beams, Dalian University of  
Technology, Ministry of Education, Dalian 116024, China*

---

\*Corresponding author. E-mail: [jiangx@dlut.edu.cn](mailto:jiangx@dlut.edu.cn) (Xue Jiang)

**Table S1.** Vacancy formation energies ( $E_F$ ) in V-rich/Se-rich condition, average magnetic moments ( $M$ ), and V–Se bond lengths ( $d_{V-Se}$ ) surrounding vacancies in the perfect and 45 kinds of defective VSe<sub>2</sub> monolayers (MLs).

| Systems               | $E_F$<br>(eV) | $M$<br>( $\mu_B/V$ ) | $d_{V-Se}$<br>(Å) | Systems                       | $E_F$<br>(eV) | $M$<br>( $\mu_B/V$ ) | $d_{V-Se}$<br>(Å) |
|-----------------------|---------------|----------------------|-------------------|-------------------------------|---------------|----------------------|-------------------|
| VSe <sub>2</sub>      | ---           | 0.675                | 2.486             | D <sub>Se</sub> -(9)          | 0.38/2.00     | 0.379                | 2.516             |
| S <sub>V</sub>        | 2.94/1.32     | 0.567                | 2.404             | D <sub>Se</sub> -(10)         | 0.11/1.73     | 0.183                | 2.514             |
| S <sub>Se</sub>       | 0.36/1.17     | 0.466                | 2.511             | D <sub>Se</sub> -(11)         | 0.86/2.48     | 0.315                | 2.516             |
| D <sub>V</sub> -(1)   | 5.11/1.87     | 0.390                | 2.431             | D <sub>Se</sub> -(12)         | 0.46/2.08     | 0.322                | 2.510             |
| D <sub>V</sub> -(2)   | 6.13/2.89     | 0.526                | 2.408             | D <sub>Se</sub> -(13)         | 0.46/2.08     | 0.670                | 2.459             |
| D <sub>V</sub> -(3)   | 6.13/2.87     | 0.529                | 2.412             | D <sub>Se</sub> -(14)         | 0.37/1.99     | 0.427                | 2.517             |
| D <sub>V</sub> -(4)   | 5.96/2.72     | 0.478                | 2.405             | D <sub>Se</sub> -(15)         | 0.67/2.29     | 0.707                | 2.490             |
| D <sub>VSe</sub> -(1) | 2.35/1.54     | 0.461                | 2.421             | T <sub>Se</sub> -(1)(1)       | 1.34/3.77     | 0.677                | 2.434             |
| D <sub>VSe</sub> -(2) | 2.87/2.06     | 0.370                | 2.449             | T <sub>Se</sub> -(2)(2)       | 1.17/3.60     | 0.681                | 2.434             |
| D <sub>VSe</sub> -(3) | 2.99/2.18     | 0.440                | 2.441             | T <sub>Se</sub> -(6)(6)       | 0.82/3.25     | 0.279                | 2.514             |
| D <sub>VSe</sub> -(4) | 3.00/2.19     | 0.481                | 2.648             | T <sub>Se</sub> -(10)(10)     | 0.75/3.18     | 0.213                | 2.504             |
| D <sub>VSe</sub> -(5) | 3.18/2.37     | 0.476                | 2.439             | T <sub>Se</sub> -(11)(11)     | 1.74/4.17     | 0.800                | 2.519             |
| D <sub>VSe</sub> -(6) | 3.13/2.32     | 0.228                | 2.452             | T <sub>Se</sub> -(1)(6)       | 0.95/3.38     | 0.700                | 2.437             |
| D <sub>VSe</sub> -(7) | 3.34/2.53     | 0.416                | 2.284             | T <sub>Se</sub> -(10)(1)      | 0.36/2.79     | 0.502                | 2.472             |
| D <sub>VSe</sub> -(8) | 3.17/2.36     | 0.292                | 2.455             | T <sub>Se</sub> -(3)(10)      | 1.34/3.77     | 0.404                | 2.516             |
| D <sub>Se</sub> -(1)  | 0.43/2.05     | 0.596                | 2.452             | T <sub>Se</sub> -(10)(2)      | 0.96/3.39     | 0.632                | 2.471             |
| D <sub>Se</sub> -(2)  | 0.66/2.28     | 0.751                | 2.426             | Q <sub>Se</sub> -(2)(4)(2)    | 2.42/5.66     | 0.723                | 2.455             |
| D <sub>Se</sub> -(3)  | 1.27/2.89     | 0.405                | 2.513             | Q <sub>Se</sub> -(2)(5)(2)    | 4.24/7.48     | 0.737                | 2.468             |
| D <sub>Se</sub> -(4)  | 0.45/2.07     | 0.270                | 2.517             | Q <sub>Se</sub> -(6)(2)(3)    | 3.11/6.35     | 0.803                | 2.460             |
| D <sub>Se</sub> -(5)  | 0.16/1.78     | 0.547                | 2.498             | Q <sub>Se</sub> -(2)(5)(9)    | 1.80/5.04     | 0.576                | 2.432             |
| D <sub>Se</sub> -(6)  | 0.76/2.38     | 0.411                | 2.499             | Q <sub>Se</sub> -(9)(6)(4)    | 1.50/4.74     | 0.322                | 2.521             |
| D <sub>Se</sub> -(7)  | 0.38/2.00     | 0.197                | 2.494             | Q <sub>Se</sub> -(17)(9)(17)  | 2.17/5.41     | 0.712                | 2.458             |
| D <sub>Se</sub> -(8)  | 0.32/1.94     | 0.534                | 2.494             | Q <sub>Se</sub> -(21)(10)(10) | 0.97/4.21     | 0.208                | 2.507             |

**Table S2.** Electronic occupation numbers ( $N_{eo}$ ) of d orbitals for the V atoms near the Se vacancies. The positive and negative values represent spin up and spin down, respectively.

|                               | $d_{yz}/d_{xz}$ | $d_{yz}/d_{xz}$ | $d_{xy}/d_{x^2-y^2}$ | $d_{xy}/d_{x^2-y^2}$ | $d_z^2$ | $d_z^2$ |
|-------------------------------|-----------------|-----------------|----------------------|----------------------|---------|---------|
| VSe <sub>2</sub>              | 0.449           | -0.345          | 0.364                | -0.242               | 0.384   | -0.172  |
| S <sub>Se</sub>               | 0.416           | -0.384          | 0.338                | -0.292               | 0.330   | -0.279  |
| D <sub>Se</sub> -(10)         | 0.400           | -0.400          | 0.294                | -0.296               | 0.314   | -0.311  |
| T <sub>Se</sub> -(10)(10)     | 0.404           | -0.388          | 0.330                | -0.321               | 0.333   | -0.282  |
| Q <sub>Se</sub> -(21)(10)(10) | 0.377           | -0.376          | 0.326                | -0.308               | 0.332   | -0.291  |

**Table S3.** Electronic occupation numbers ( $N_{eo}$ ) of d orbitals for the V atoms away from Se vacancies. The positive and negative values represent spin up and spin down, respectively.

|                               | $d_{yz}/d_{xz}$ | $d_{yz}/d_{xz}$ | $d_{xy}/$<br>$d_{x^2-y^2}$ | $d_{xy}/d_{x^2-y^2}$ | $d_{z^2}$ | $d_{z^2}$ |
|-------------------------------|-----------------|-----------------|----------------------------|----------------------|-----------|-----------|
| VSe <sub>2</sub>              | 0.449           | -0.345          | 0.364                      | -0.242               | 0.384     | -0.172    |
| S <sub>Se</sub>               | 0.433           | -0.359          | 0.347                      | -0.262               | 0.368     | -0.210    |
| D <sub>Se</sub> -(10)         | 0.405           | -0.374          | 0.330                      | -0.283               | 0.328     | -0.277    |
| T <sub>Se</sub> -(10)(10)     | 0.427           | -0.361          | 0.325                      | -0.272               | 0.348     | -0.282    |
| Q <sub>Se</sub> -(21)(10)(10) | 0.403           | -0.371          | 0.326                      | -0.275               | 0.359     | -0.286    |

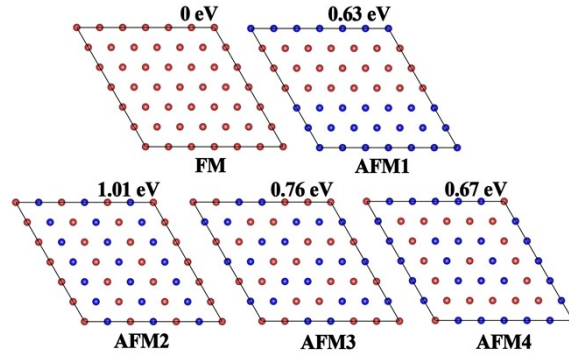

**Figure S1.** Spin arrangements of calculated ferromagnetic (FM) and antiferromagnetic (AFM) configurations. Red and blue balls represent V atoms in the states of spin up and spin down, respectively. The Se atoms are omitted for simplicity. The numbers represent the energy differences between the five configurations and the FM ordering.

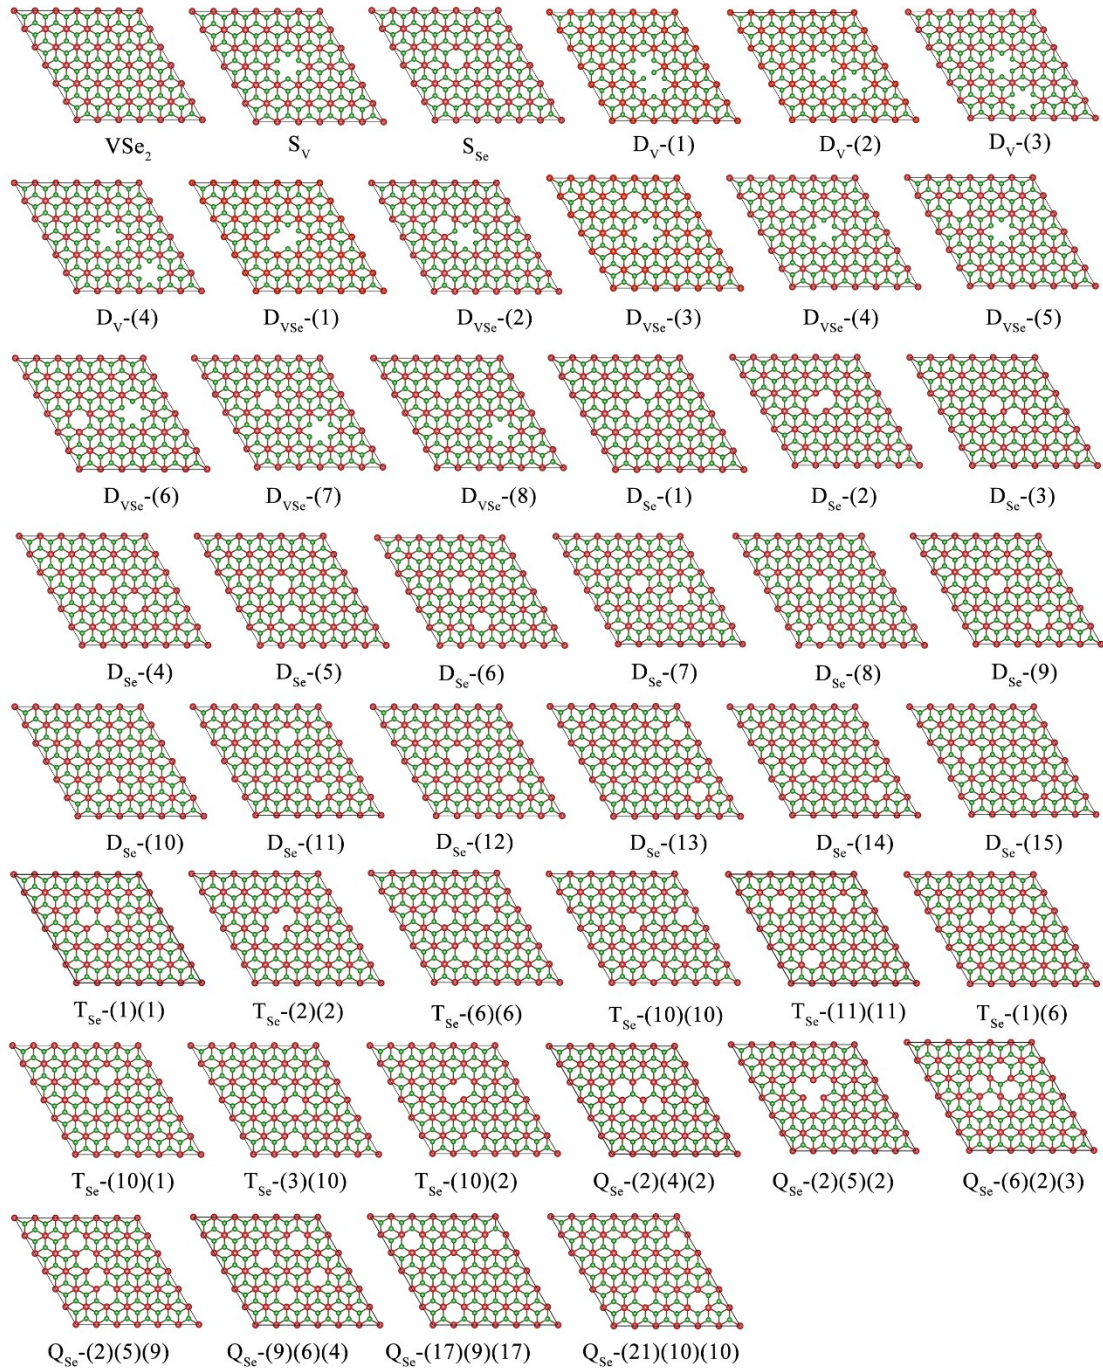

**Figure S2.** Geometric configurations of perfect  $VSe_2$  monolayers and 45 kinds of vacancy structures.

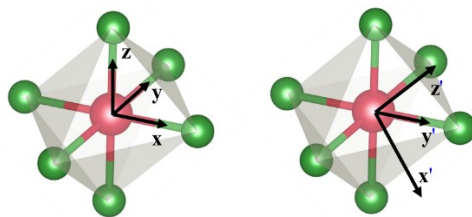

**Figure S3.** Conventional octahedral crystal structure with respect to the standard Cartesian coordinate  $x, y, z$  in 1T-VSe<sub>2</sub> (left); The same structure in the rotated Cartesian coordinate system  $x', y', z'$  in triangular field (right).
